# Supplementary material for: Pattern-Triggered Immunity Suppresses Programmed Cell Death Triggered by Fumonisin B1
Source: PubMed Central journal article supplement (PMC3613394; doi:10.1371/journal.pone.0060769), 2013-04-01

## Supporting Information Figure S3

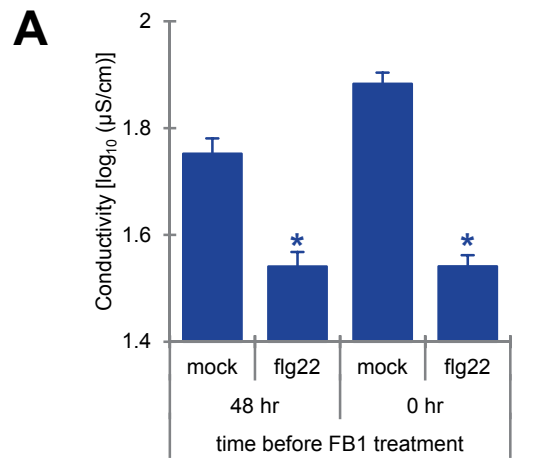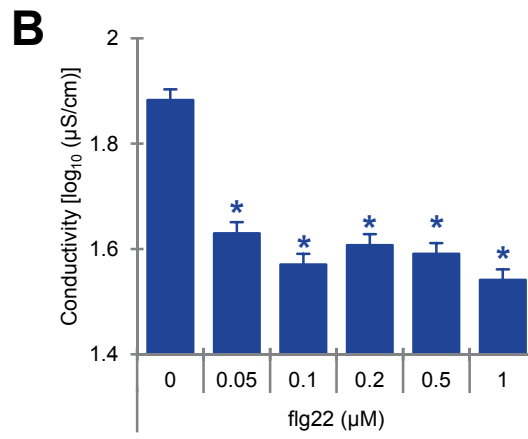

Supplement: pone.0060769.s003.pdf [file pone.0060769.s003.pdf]
